# Supplementary material for: Cross Cultivation on Homologous/Heterologous Plant-Based Culture Media Empowers Host-Specific and Real Time In Vitro Signature of Plant Microbiota
Source: MDPI journal article supplement (doi:10.3390/d15010046), 2022-12-30
Supplement: s1 [file s1]

**Table S1. Number of OTUs of culture-dependent endophytes of endo-phylosphere of maize obtained for all tested culture media in three replicates, and for the original mother culture medium (culture-independent).**

| <b>Sample Code</b> | <b>Culture media</b>          | <b>DNA conc. (ng/μl)</b> | <b>Quality (260/280 nm)</b> | <b>Total number of OTUs</b> | <b>Average number of OTUs</b> |
|--------------------|-------------------------------|--------------------------|-----------------------------|-----------------------------|-------------------------------|
| MPh-YsH 1          | Sunflower broth 25 ml         | 39.8                     | 2.1                         | 82529                       | 89461                         |
| MPh-YsH 2          | Sunflower broth 25 ml         | 23.0                     | 2.0                         | 91134                       |                               |
| MPh-YsH 3          | Sunflower broth 25 ml         | 35.6                     | 2.1                         | 94721                       |                               |
| MPh-YsL 1          | Sunflower broth 5 ml          | 12.9                     | 2.0                         | 51004                       | 83325                         |
| MPh-YsL 2          | Sunflower broth 5 ml          | 9.71                     | 2.0                         | 101202                      |                               |
| MPh-YsL 3          | Sunflower broth 5 ml          | 11.3                     | 2.1                         | 97769                       |                               |
| MPh-YmH 1          | Maize broth 25 ml             | 40.3                     | 2.0                         | 82719                       | 80390                         |
| MPh-YmH 2          | Maize broth 25 ml             | 25.2                     | 2.0                         | 86018                       |                               |
| MPh-YmH 3          | Maize broth 25 ml             | 18.7                     | 2.1                         | 72432                       |                               |
| MPh-YmL 1          | Maize broth 5 ml              | 26.9                     | 2.0                         | 81959                       | 70464                         |
| MPh-YmL 2          | Maize broth 5 ml              | 18.2                     | 2.1                         | 84137                       |                               |
| MPh-YmL 3          | Maize broth 5 ml              | 26.4                     | 2.1                         | 45297                       |                               |
| MPh-2A 1           | R2A1/10                       | 34.3                     | 2.1                         | 82014                       | 85453                         |
| MPh-2A 2           | R2A1/10                       | 30.9                     | 2.0                         | 90193                       |                               |
| MPh-2A 3           | R2A1/10                       | 43.2                     | 2.1                         | 84152                       |                               |
| ML 2               | Mother culture (plant leaves) | 48.1                     | 1.8                         | 82910                       | 89201                         |
| ML 3               | Mother culture (plant leaves) | 91.1                     | na                          | 95492                       |                               |

**Table S2. Nutritional profile of the dehydrated powders of tested maize (*Zea mays* L.) and sunflower plants (*Helianthus annuus* L.).**

Between brackets are % increase for sunflower values over those of maize

| Parameters                   | <i>Zea mays</i> L. | <i>Helianthus annuus</i> L. |
|------------------------------|--------------------|-----------------------------|
| Total crude protein (%)      | 11.15              | 24.1 (116 %)                |
| Total crude Fiber (%)        | 21.3               | 7.96                        |
| Total ash (%)                | 6.6                | 16.6 (151.5 %)              |
| Total carbohydrates (%)      | 72.58              | 50.31                       |
| <b>Amino Acids (%)</b>       |                    |                             |
| Aspartic                     | 1.24               | 2.13 (71.8 %)               |
| Therionine                   | 0.62               | 1.09 (75.8 %)               |
| Serine                       | 0.64               | 0.84 (31.3 %)               |
| Glutamic                     | 1.59               | 2.47 (55.3 %)               |
| Proline                      | 0.74               | 0.92 (24.3 %)               |
| Glycine                      | 0.75               | 1.21 (61.3 %)               |
| Alanine                      | 1.09               | 1.59 (45.9 %)               |
| Valine                       | 0.99               | 1.61 (62.6 %)               |
| Methionine                   | 0.35               | 0.57 (62.9 %)               |
| Isoleucine                   | 0.58               | 0.94 (62.1 %)               |
| Leucine                      | 1.12               | 1.88 (67.9 %)               |
| Tyrosine                     | 0.69               | 1.07 (55.1 %)               |
| Phenylalanine                | 0.75               | 1.29 (72 %)                 |
| Histidine                    | 0.25               | 0.36 (44 %)                 |
| Lysine                       | 0.72               | 0.96 (33.3 %)               |
| Argnine                      | 0.43               | 1.16 (169.8 %)              |
| Cysteine                     | 0.19               | 0.29 (52.6 %)               |
| <b>Macro-nutrients (ppm)</b> |                    |                             |
| Ca                           | 0.66               | 2.49                        |
| Mg                           | 0.21               | 0.22                        |
| Na                           | 1.35               | 1.89                        |
| K                            | 1.84               | 2.09                        |
| P (%)                        | 0.12               | 0.29                        |
| <b>Micro-nutrients (ppm)</b> |                    |                             |
| Cu                           | 1.06               | 2.52                        |
| Zn                           | 0.34               | 0.39                        |
| Fe                           | 0.96               | 0.31                        |
| Mn                           | 1.16               | 1.34                        |
| Se (ppb)                     | 31.08              | 68.72                       |
| Pb (ppb)                     | 0.21               | 0.23                        |

| Parameter                    | Maize | Sunflower |     |
|------------------------------|-------|-----------|-----|
| Total crude protein (%)      | 11.15 | 24.1      | 6   |
| Total crude Fiber (%)        | 21.3  | 7.96      | 24  |
| Total ash (%)                | 6.6   | 16.6      | 50  |
| Total carbohydrates (%)      | 72.58 | 50.31     | 72  |
| <b>Macro-nutrients (ppm)</b> |       |           |     |
| Ca                           | 0.66  | 2.49      | 0.1 |
| Mg                           | 0.21  | 0.22      | 0.6 |
| Na                           | 1.35  | 1.89      | 1.3 |
| K                            | 1.84  | 2.09      | 1.8 |
| P                            | 0.12  | 0.29      | 2   |
| <b>Micro-nutrients (ppm)</b> |       |           |     |
| Cu                           | 1.06  | 2.52      | 0.2 |
| Zn                           | 0.34  | 0.39      | 0.3 |
| Fe                           | 0.96  | 0.31      | 1.3 |
| Mn                           | 1.16  | 1.34      | 31  |
| Se                           | 31.08 | 68.72     | 68  |
| Pb                           | 0.21  | 0.23      |     |
| <b>Amino Acids (%)</b>       |       |           |     |
| Aspartic                     | 1.24  | 2.13      |     |
| Therionine                   | 0.62  | 1.09      |     |
| Serine                       | 0.64  | 0.84      |     |
| Glutamic                     | 1.59  | 2.47      |     |
| Proline                      | 0.74  | 0.92      | 0.1 |
| Glycine                      | 0.75  | 1.21      | 0.9 |
| Alanine                      | 1.09  | 1.59      | 1.1 |
| Valine                       | 0.99  | 1.61      | 1.6 |
| Methionine                   | 0.35  | 0.57      | 1.8 |
| Isoleucine                   | 0.58  | 0.94      | 2   |
| Leucine                      | 1.12  | 1.88      |     |
| Tyrosine                     | 0.69  | 1.07      |     |
| Phenylalanine                | 0.75  | 1.29      |     |
| Histidine                    | 0.25  | 0.36      |     |
| Lysine                       | 0.72  | 0.96      |     |
| Argnine                      | 0.43  | 1.16      |     |
| Cysteine                     | 0.19  | 0.29      |     |

**Table S3. Two-way ANOVA analysis of log numbers of CFUs (data are log means  $\pm$  standard error [SE], n=5) of culturable endophytes of endo-rhizosphere and endo-phyllosphere of maize developed on the various culture media**

| Culture media                                       | Two-way interactions (plant sphere x culture media) |                               |                               |                                |
|-----------------------------------------------------|-----------------------------------------------------|-------------------------------|-------------------------------|--------------------------------|
|                                                     | Log No. CFUs g <sup>-1</sup> DW                     |                               |                               |                                |
|                                                     | Total colonies                                      |                               | Micro-colonies                |                                |
|                                                     | Endo-rhizosphere                                    | Endo-phyllosphere             | Endo-rhizosphere              | Endo-phyllosphere              |
| <b>R2A</b>                                          | 7.55 $\pm$ 0.021 <sup>d</sup>                       | 7.39 $\pm$ 0.022 <sup>e</sup> | 4.68 $\pm$ 0.627 <sup>b</sup> | 1.02 $\pm$ 0.560 <sup>d</sup>  |
| <b>MPhYsH</b>                                       | .810 $\pm$ 0.073 <sup>a</sup>                       | 7.09 $\pm$ 0.027 <sup>f</sup> | 4.96 $\pm$ 0.837 <sup>b</sup> | 1.29 $\pm$ 0.599 <sup>d</sup>  |
| <b>MPhYsL</b>                                       | 7.86 $\pm$ 0.072 <sup>b</sup>                       | 6.85 $\pm$ 0.026 <sup>g</sup> | 6.56 $\pm$ 0.504 <sup>a</sup> | 3.80 $\pm$ 0.653 <sup>bc</sup> |
| <b>MPhYmH</b>                                       | 7.57 $\pm$ 0.035 <sup>d</sup>                       | 6.01 $\pm$ 0.028 <sup>h</sup> | 7.34 $\pm$ 0.088 <sup>a</sup> | 2.86 $\pm$ 0.605 <sup>c</sup>  |
| <b>MPhYmL</b>                                       | 7.76 $\pm$ 0.075 <sup>c</sup>                       | 5.99 $\pm$ 0.035 <sup>h</sup> | 7.15 $\pm$ 0.063 <sup>a</sup> | 4.49 $\pm$ 0.456 <sup>b</sup>  |
| <b>LSD (<i>p</i> value <math>\leq</math> 0. 05)</b> | <b>0.07</b>                                         |                               | <b>1.33</b>                   |                                |

\*Statistically significant differences are designated by different letters ( $P \leq 0.05$ , n =5)

**R2A**, Reasoner's 2A agar; **MPhYmH**, culture-dependent on homologous maize broth 25mL-1; **MPhYmL**, culture-dependent on homologous maize broth 5mL-1; **MPhYsH** culture-dependent on heterologous sunflower broth 25mL-1; **MPhYsL**, culture-dependent on heterologous sunflower broth 5mL.

**Table S4. Relative abundance <sup>a</sup> of dominant phyla, classes and orders in all tested culture-independent and culture-dependent samples <sup>b</sup> (average  $\pm$  standard error of the mean).**

| Phylum                     | Class                                   | Order                                | ML                             | MPh2A                          | MPhYm<br>H                    | MPhYmL                         | MPhYsH                                    | MPhYs<br>L                        |
|----------------------------|-----------------------------------------|--------------------------------------|--------------------------------|--------------------------------|-------------------------------|--------------------------------|-------------------------------------------|-----------------------------------|
| <b>Proteobacter<br/>ia</b> |                                         |                                      | 94.81 $\pm$ 2.16 <sup>ab</sup> | 94.76 $\pm$ 1.32 <sub>ab</sub> | 98.26 $\pm$ 0.2 <sub>5a</sub> | 98 $\pm$ 0.41 <sup>ab</sup>    | 95.27 $\pm$<br>2.26 <sub>ab</sub>         | 94.32 $\pm$<br>0.82 <sub>b</sub>  |
|                            | <b>Gammaproteobacteria</b>              |                                      | 66.06 $\pm$ 12.71 <sup>b</sup> | 79.61 $\pm$ 1.55 <sub>ab</sub> | 85.8 $\pm$ 2.73 <sub>a</sub>  | 84.78 $\pm$ 3.85 <sub>a</sub>  | 77.02 $\pm$<br>1.39 <sub>ab</sub>         | 72.45 $\pm$<br>3.06 <sub>b</sub>  |
|                            |                                         | Pseudomonadales                      | 38.24 $\pm$ 4.92 <sup>c</sup>  | 72.78 $\pm$ 2.2 <sup>ab</sup>  | 77.24 $\pm$ 3.6 <sub>1a</sub> | 78.37 $\pm$ 0.59 <sub>a</sub>  | 71.98 $\pm$ 1.11 <sub>ab</sub>            | 66.99 $\pm$<br>3.51 <sub>b</sub>  |
|                            |                                         | Enterobacteriales                    | 22.68 $\pm$ 7.92 <sup>a</sup>  | 4.6 $\pm$ 0.84 <sup>b</sup>    | 5.84 $\pm$ 0.72 <sub>b</sub>  | 3.37 $\pm$ 3.69 <sup>b</sup>   | 2.81 $\pm$<br>1.74 <sup>b</sup>           | 2.94 $\pm$<br>1.2 <sub>b</sub>    |
|                            |                                         | Gammaproteobacteria_unclassif<br>ied | 1.05 $\pm$ 0.07 <sup>b</sup>   | 2.21 $\pm$ 0.18 <sup>ab</sup>  | 2.72 $\pm$ 0.19 <sub>a</sub>  | 3.03 $\pm$ 0.62 <sup>a</sup>   | 2.05 $\pm$<br>0.25 <sup>ab</sup>          | 2.47 $\pm$<br>0.56 <sub>a</sub>   |
|                            |                                         | Xanthomonadales                      | 4.09 $\pm$ 0.2 <sup>a</sup>    | 0.01 $\pm$ 0.01 <sup>b</sup>   | 0.01 $\pm$ 0 <sup>b</sup>     | 0.01 $\pm$ 0 <sup>b</sup>      | 0.17 $\pm$ 0.27 <sup>b</sup>              | 0.05 $\pm$<br>0.02 <sub>b</sub>   |
|                            | <b>Alphaproteobacteria</b>              |                                      | 21.34 $\pm$ 4.12 <sup>a</sup>  | 14.75 $\pm$ 1.1 <sup>ab</sup>  | 12.35 $\pm$ 2.8 <sub>2b</sub> | 12.49 $\pm$ 4.33 <sub>b</sub>  | 16.98 $\pm$ 0.83 <sub>ab</sub>            | 18.43 $\pm$<br>2.16 <sub>ab</sub> |
|                            |                                         | Rhizobiales                          | 15.21 $\pm$ 4.58 <sup>a</sup>  | 0.45 $\pm$ 0.35 <sup>b</sup>   | 0.14 $\pm$ 0.16 <sub>b</sub>  | 1.91 $\pm$ 3.11 <sup>b</sup>   | 0.76 $\pm$ 0.51 <sup>b</sup>              | 1.3 $\pm$<br>0.73 <sub>b</sub>    |
|                            |                                         | Sphingomonadales                     | 6.11 $\pm$ 0.46 <sup>bc</sup>  | 14.12 $\pm$ 1.2 <sup>ab</sup>  | 11.96 $\pm$ 2.3 <sub>ab</sub> | 10.55 $\pm$ 3.78 <sub>bc</sub> | 16.17 $\pm$ 0.88 <sub>a</sub>             | 17.09 $\pm$<br>2.14 <sub>a</sub>  |
|                            |                                         | Alphaproteobacteria_unclassif<br>ied | 0.02 $\pm$ 0                   | 0.03 $\pm$ 0                   | 0.03 $\pm$ 0.01               | 0.02 $\pm$ 0.01                | 0.04 $\pm$ 0                              | 0.04 $\pm$<br>0.01                |
|                            |                                         | Caulobacteriales                     | 0 $\pm$ 0                      | 0.13 $\pm$ 0.23                | 0 $\pm$ 0                     | 0 $\pm$ 0                      | 0.01 $\pm$ 0.01                           | 0 $\pm$ 0                         |
|                            |                                         | Rhodobacterales                      | 0 $\pm$ 0                      | 0.01 $\pm$ 0.01                | 0.22 $\pm$ 0.37               | 0.01 $\pm$ 0                   | 0.01 $\pm$ 0.01                           | 0 $\pm$ 0                         |
|                            | <b>Betaproteobacteria</b>               |                                      | 7.3 $\pm$ 6.42 <sup>a</sup>    | 0.3 $\pm$ 0.51 <sup>b</sup>    | 0 $\pm$ 0 <sup>b</sup>        | 0.6 $\pm$ 0.54 <sup>b</sup>    | 1.16 $\pm$ 0.92 <sup>a</sup> <sub>b</sub> | 3.33 $\pm$<br>1.58 <sub>ab</sub>  |
|                            |                                         | Burkholderiales                      | 7.24 $\pm$ 6.35 <sup>a</sup>   | 0.29 $\pm$ 0.5 <sup>b</sup>    | 0 $\pm$ 0 <sup>b</sup>        | 0.59 $\pm$ 0.53 <sup>b</sup>   | 1.15 $\pm$ 0.91 <sup>a</sup> <sub>b</sub> | 3.3 $\pm$ 1.58 <sub>ab</sub>      |
|                            |                                         | Betaproteobacteria_unclassifie<br>d  | 0.06 $\pm$ 0.07                | 0 $\pm$ 0.01                   | 0 $\pm$ 0                     | 0.01 $\pm$ 0.01                | 0.01 $\pm$ 0.01                           | 0.03 $\pm$<br>0.01                |
|                            | <b>Proteobacteria_unclassi<br/>fied</b> |                                      | 0.11 $\pm$ 0.02                | 0.1 $\pm$ 0.01                 | 0.1 $\pm$ 0.01                | 0.12 $\pm$ 0.03                | 0.1 $\pm$ 0                               | 0.11 $\pm$<br>0.02                |
|                            |                                         | Proteobacteria_unclassified          | 0.11 $\pm$ 0.02                | 0.1 $\pm$ 0.01                 | 0.1 $\pm$ 0.01                | 0.12 $\pm$ 0.03                | 0.1 $\pm$ 0                               | 0.11 $\pm$<br>0.02                |
| <b>Firmicutes</b>          |                                         |                                      | 1.63 $\pm$ 0.38 <sup>bc</sup>  | 3.73 $\pm$ 0.5 <sub>a</sub>    | 1.25 $\pm$ 0.22               | 1.43 $\pm$ 0.32 <sup>c</sup>   | 3.25 $\pm$ 0.8 <sup>ab</sup>              | 3.34 $\pm$ 0.6                    |

|                       |                         |                 |                        |                       |                        |                        |                       |                        |
|-----------------------|-------------------------|-----------------|------------------------|-----------------------|------------------------|------------------------|-----------------------|------------------------|
|                       |                         |                 |                        |                       | c                      |                        |                       | a                      |
|                       | <b>Bacilli</b>          |                 | 1.47±0.15 <sup>b</sup> | 3.73±0.5 <sup>a</sup> | 1.25±0.22 <sup>b</sup> | 1.43±0.32 <sup>b</sup> | 3.25±0.8 <sup>a</sup> | 3.33±0.6 <sup>2a</sup> |
|                       |                         | Bacillales      | 1.47±0.15              | 3.73±0.5              | 1.25±0.22              | 1.43±0.32              | 3.25±0.8              | 3.33±0.6 <sup>2</sup>  |
|                       | <b>Clostridia</b>       |                 | 0.16±0.23              | 0 ± 0                 | 0 ± 0                  | 0 ± 0                  | 0 ± 0                 | 0 ± 0                  |
|                       |                         | Clostridiales   | 0.16±0.23              | 0 ± 0                 | 0 ± 0                  | 0 ± 0                  | 0 ± 0                 | 0 ± 0                  |
| <b>Bacteroidetes</b>  |                         |                 | 3.09±2.82              | 0.96 ± 1.66           | 0 ± 0                  | 0.01 ± 0.01            | 0.92 ± 1.49           | 1.58 ± 0.4             |
|                       | <b>Flavobacteriia</b>   |                 | 3.09±2.82              | 0.95 ± 1.65           | 0 ± 0                  | 0 ± 0                  | 0.87 ± 1.4            | 1.53 ± 0.43            |
|                       | <b>Saprospirae</b>      |                 | 0±0                    | 0 ± 0                 | 0 ± 0                  | 0 ± 0                  | 0.05 ± 0.08           | 0 ± 0                  |
|                       | <b>Sphingobacteriia</b> |                 | 0±0                    | 0 ± 0                 | 0 ± 0                  | 0 ± 0                  | 0 ± 0                 | 0.05 ± 0.09            |
| <b>Actinobacteria</b> |                         |                 | 0.11±0.15              | 0.12 ± 0.09           | 0.06 ± 0.04            | 0.07 ± 0.03            | 0.17 ± 0.19           | 0.34 ± 0.29            |
|                       | <b>Actinobacteria</b>   |                 | 0.11±0.15              | 0.12 ± 0.09           | 0.06 ± 0.04            | 0.07 ± 0.03            | 0.17 ± 0.19           | 0.34 ± 0.29            |
|                       |                         | Actinomycetales | 0.11±0.15              | 0.12 ± 0.09           | 0.06 ± 0.04            | 0.07 ± 0.03            | 0.17 ± 0.19           | 0.34 ± 0.29            |

<sup>a</sup> Number shows the average percentage followed by ± standard deviation. Treatments sharing the same letters are non-significantly different ( $p < 0.05$ , ANOVA under generalized linear model followed by Tukey's Honest Significant Detection test). Significant increases in abundance compared to the ML are highlighted in green, while significant decreases are highlighted in red.

<sup>b</sup> ML, culture-independent mother leaf; MPh2A, culture-dependent of R2A culture medium; MPhYmH, culture-dependent on homologous maize broth 25mL<sup>-1</sup>; MPhYmL, culture-dependent on homologous maize broth 5mL<sup>-1</sup>; MPhYsH culture-dependent on heterologous sunflower broth 25mL<sup>-1</sup>; MPhYsL, culture-dependent on heterologous sunflower broth 5mL<sup>-1</sup>.

**Table S5. Relative abundance<sup>a</sup> of dominant families and genera in all tested culture-independent and culture-dependent samples <sup>b</sup> (average  $\pm$  standard error of the mean).**

| Family             | Genera                          | ML                             | MPh2A                          | MPhYmH                          | MPhYmL                         | MPhYsH                         | MPhYsL                         |
|--------------------|---------------------------------|--------------------------------|--------------------------------|---------------------------------|--------------------------------|--------------------------------|--------------------------------|
| Enterobacteriaceae |                                 | 22.68 $\pm$ 7.92 <sup>a</sup>  |                                |                                 |                                |                                |                                |
|                    | Family                          |                                | 4.6 $\pm$ 0.84 <sup>b</sup>    | 5.84 $\pm$ 0.72 <sup>b</sup>    | 3.37 $\pm$ 3.69 <sup>b</sup>   | 2.81 $\pm$ 1.74 <sup>b</sup>   | 2.94 $\pm$ 1.2 <sup>b</sup>    |
|                    | Enterobacteriaceae unclassified | 22.4 $\pm$ 8.24 <sup>a</sup>   | 0.16 $\pm$ 0.01 <sup>b</sup>   | 0.17 $\pm$ 0.03 <sup>b</sup>    | 0.16 $\pm$ 0.1 <sup>b</sup>    | 0.11 $\pm$ 0.04 <sup>b</sup>   | 0.12 $\pm$ 0.02 <sup>b</sup>   |
|                    | Erwinia                         | 0.28 $\pm$ 0.32                | 4.43 $\pm$ 0.84                | 5.67 $\pm$ 0.72                 | 3.21 $\pm$ 3.6                 | 2.71 $\pm$ 1.7                 | 2.83 $\pm$ 1.21                |
| Sphingomonadaceae  |                                 |                                |                                |                                 |                                |                                |                                |
|                    | Family                          | 6.1 $\pm$ 0.46 <sup>c</sup>    | 14.12 $\pm$ 1.2 <sup>ab</sup>  | 11.96 $\pm$ 2.3 <sup>abc</sup>  | 10.55 $\pm$ 3.78 <sup>bc</sup> | 16.17 $\pm$ 0.88 <sup>ab</sup> | 17.09 $\pm$ 2.14 <sup>a</sup>  |
|                    | Sphingomonadaceae unclassified  | 0.01 $\pm$ 0 <sup>b</sup>      | 0.04 $\pm$ 0.01 <sup>ab</sup>  | 0.03 $\pm$ 0.01 <sup>ab</sup>   | 0.03 $\pm$ 0 <sup>ab</sup>     | 0.04 $\pm$ 0.01 <sup>ab</sup>  | 0.05 $\pm$ 0.01 <sup>a</sup>   |
|                    | Sphingomonas                    | 6.09 $\pm$ 0.46 <sup>c</sup>   | 14.08 $\pm$ 1.19 <sup>ab</sup> | 11.93 $\pm$ 2.29 <sup>abc</sup> | 10.53 $\pm$ 3.78 <sup>bc</sup> | 16.13 $\pm$ 0.87 <sup>ab</sup> | 17.04 $\pm$ 2.14 <sup>a</sup>  |
| Rhizobiaceae       |                                 |                                |                                |                                 |                                |                                |                                |
|                    | Family                          | 15.04 $\pm$ 4.54 <sup>a</sup>  | 0.18 $\pm$ 0.26 <sup>b</sup>   | 0.03 $\pm$ 0.02 <sup>b</sup>    | 1.84 $\pm$ 3.14 <sup>b</sup>   | 0.32 $\pm$ 0.29 <sup>b</sup>   | 1.02 $\pm$ 0.53 <sup>b</sup>   |
|                    | Agrobacterium                   | 14.93 $\pm$ 4.52 <sup>a</sup>  | 0.17 $\pm$ 0.25 <sup>b</sup>   | 0.02 $\pm$ 0.02 <sup>b</sup>    | 1.81 $\pm$ 3.08 <sup>b</sup>   | 0.3 $\pm$ 0.28 <sup>b</sup>    | 0.99 $\pm$ 0.51 <sup>b</sup>   |
|                    | Rhizobiaceae unclassified       | 0.12 $\pm$ 0.03 <sup>a</sup>   | 0 $\pm$ 0 <sup>b</sup>         | 0 $\pm$ 0 <sup>b</sup>          | 0.04 $\pm$ 0.06 <sup>ab</sup>  | 0.01 $\pm$ 0.01 <sup>b</sup>   | 0.02 $\pm$ 0.01 <sup>b</sup>   |
|                    | Shinella                        | 0 $\pm$ 0 <sup>b</sup>         | 0 $\pm$ 0 <sup>b</sup>         | 0 $\pm$ 0 <sup>b</sup>          | 0 $\pm$ 0 <sup>b</sup>         | 0 $\pm$ 0 <sup>b</sup>         | 0.01 $\pm$ 0.01 <sup>a</sup>   |
| Moraxellaceae      |                                 |                                |                                |                                 |                                |                                |                                |
|                    | Family                          | 15.46 $\pm$ 15.16 <sup>b</sup> | 54.09 $\pm$ 1.8 <sup>a</sup>   | 55.62 $\pm$ 0.2 <sup>a</sup>    | 52.01 $\pm$ 2.24 <sup>a</sup>  | 50.48 $\pm$ 2.65 <sup>a</sup>  | 46.02 $\pm$ 1.83 <sup>a</sup>  |
|                    | Acinetobacter                   | 23.12 $\pm$ 4.33 <sup>c</sup>  | 50.29 $\pm$ 1.63 <sup>a</sup>  | 50.84 $\pm$ 0.4 <sup>a</sup>    | 46.6 $\pm$ 2.97 <sup>ab</sup>  | 46.93 $\pm$ 2.96 <sup>ab</sup> | 41.63 $\pm$ 2.15 <sup>b</sup>  |
| Pseudomonadaceae   |                                 |                                |                                |                                 |                                |                                |                                |
|                    | Family                          | 15.12 $\pm$ 9.25 <sup>b</sup>  | 22.49 $\pm$ 2.05 <sup>ab</sup> | 26.4 $\pm$ 3.21 <sup>ab</sup>   | 31.76 $\pm$ 2.75 <sup>a</sup>  | 25.04 $\pm$ 3.39 <sup>ab</sup> | 25.35 $\pm$ 5.44 <sup>ab</sup> |
|                    | Pseudomonas                     | 14.87 $\pm$ 8.95 <sup>b</sup>  | 22.42 $\pm$ 2.05 <sup>ab</sup> | 26.31 $\pm$ 3.21 <sup>ab</sup>  | 31.66 $\pm$ 2.74 <sup>a</sup>  | 22.32 $\pm$ 1.17 <sup>ab</sup> | 24.64 $\pm$ 5.43 <sup>ab</sup> |
| Xanthomonadaceae   |                                 |                                |                                |                                 |                                |                                |                                |
|                    | Family                          | 4.09 $\pm$ 0.2 <sup>a</sup>    | 0.01 $\pm$ 0.01 <sup>b</sup>   | 0.01 $\pm$ 0 <sup>b</sup>       | 0.01 $\pm$ 0 <sup>b</sup>      | 0.17 $\pm$ 0.27 <sup>b</sup>   | 0.05 $\pm$ 0.02 <sup>b</sup>   |
|                    | Stenotrophomonas                | 4.01 $\pm$ 0.18 <sup>a</sup>   | 0 $\pm$ 0 <sup>b</sup>         | 0 $\pm$ 0 <sup>b</sup>          | 0.01 $\pm$ 0 <sup>b</sup>      | 0 $\pm$ 0 <sup>b</sup>         | 0.02 $\pm$ 0.02 <sup>b</sup>   |
| Comamonadaceae     | Family                          | 7.21 $\pm$ 6.34 <sup>a</sup>   | 0.29 $\pm$ 0.5 <sup>b</sup>    | 0 $\pm$ 0 <sup>b</sup>          | 0.59 $\pm$ 0.53 <sup>b</sup>   | 0.98 $\pm$ 0.97 <sup>b</sup>   | 0.53 $\pm$ 0.35 <sup>b</sup>   |

|                                  |                                  |                          |                            |                           |                            |                            |                            |
|----------------------------------|----------------------------------|--------------------------|----------------------------|---------------------------|----------------------------|----------------------------|----------------------------|
|                                  | Comamonadaceae unclassified      | 7.21 ± 6.34 <sup>a</sup> | 0.29 ± 0.5 <sup>b</sup>    | 0 ± 0 <sup>b</sup>        | 0.59 ± 0.53 <sup>b</sup>   | 0.98 ± 0.97 <sup>b</sup>   | 0.53 ± 0.35 <sup>b</sup>   |
| Gammaproteobacteria_unclassified | Family                           | 1.05 ± 0.07 <sup>b</sup> | 2.21 ± 0.18 <sup>ab</sup>  | 2.72 ± 0.19 <sup>a</sup>  | 3.03 ± 0.62 <sup>a</sup>   | 2.05 ± 0.25 <sup>ab</sup>  | 2.47 ± 0.56 <sup>a</sup>   |
|                                  | Gammaproteobacteria unclassified | 1.05 ± 0.0 <sup>b</sup>  | 2.21 ± 0.18 <sup>ab</sup>  | 2.72 ± 0.19 <sup>a</sup>  | 3.03 ± 0.62 <sup>a</sup>   | 2.05 ± 0.25 <sup>ab</sup>  | 2.47 ± 0.56 <sup>a</sup>   |
| Bacillaceae                      | Family                           | 0 ± 0 <sup>d</sup>       | 2.35 ± 0.19 <sup>a</sup>   | 1 ± 0.38 <sup>cd</sup>    | 1.34 ± 0.29 <sup>abc</sup> | 2.45 ± 0.46 <sup>ab</sup>  | 1.51 ± 0.66 <sup>abc</sup> |
|                                  | Bacillus                         | 0 ± 0 <sup>d</sup>       | 2.35 ± 0.19 <sup>a</sup>   | 1 ± 0.38 <sup>cd</sup>    | 1.34 ± 0.29 <sup>abc</sup> | 2.45 ± 0.46 <sup>ab</sup>  | 1.51 ± 0.66 <sup>abc</sup> |
| Paenibacillaceae                 | Family                           | 1.46 ± 0.15 <sup>a</sup> | 1.36 ± 0.63 <sup>a</sup>   | 0.22 ± 0.13 <sup>bc</sup> | 0.09 ± 0.04 <sup>b</sup>   | 0.78 ± 0.35 <sup>bc</sup>  | 1.8 ± 0.2 <sup>a</sup>     |
|                                  | Paenibacillus                    | 1.46 ± 0.16 <sup>a</sup> | 0.81 ± 0.63 <sup>abc</sup> | 0 ± 0 <sup>c</sup>        | 0.01 ± 0.01 <sup>c</sup>   | 0.74 ± 0.34 <sup>abc</sup> | 1.62 ± 0.3 <sup>ab</sup>   |
| Rhizobiales_unclassified         | Family                           | 0.09 ± 0.05 <sup>a</sup> | 0 ± 0 <sup>b</sup>         | 0 ± 0 <sup>b</sup>        | 0 ± 0 <sup>b</sup>         | 0 ± 0 <sup>b</sup>         | 0.01 ± 0.01 <sup>b</sup>   |
|                                  | Rhizobiales unclassified         | 0.09 ± 0.05 <sup>a</sup> | 0 ± 0 <sup>b</sup>         | 0 ± 0 <sup>b</sup>        | 0 ± 0 <sup>b</sup>         | 0 ± 0 <sup>b</sup>         | 0.01 ± 0.01 <sup>b</sup>   |
| Alcaligenaceae                   | Family                           | 0.01 ± 0.01 <sup>b</sup> | 0 ± 0 <sup>b</sup>         | 0 ± 0 <sup>b</sup>        | 0 ± 0 <sup>b</sup>         | 0.17 ± 0.21 <sup>b</sup>   | 2.76 ± 1.77 <sup>a</sup>   |
|                                  | Achromobacter                    | 0.01 ± 0.01 <sup>b</sup> | 0 ± 0 <sup>b</sup>         | 0 ± 0 <sup>b</sup>        | 0 ± 0 <sup>b</sup>         | 0.17 ± 0.21 <sup>b</sup>   | 2.73 ± 1.74 <sup>a</sup>   |

<sup>a</sup> Number shows the average percentage followed by ± standard deviation. Treatments sharing the same letters are non-significantly different ( $p < 0.05$ , ANOVA under generalized linear model followed by Tukey's Honest Significant Detection test). Significant increases in abundance compared to the ML are highlighted in green, while significant decreases are highlighted in red.

<sup>b</sup> ML, culture-independent mother leaf; MPh2A, culture-dependent of R2A culture medium; MPhYmH, culture-dependent on homologous maize broth 25mL<sup>-1</sup>; MPhYmL, culture-dependent on homologous maize broth 5mL<sup>-1</sup>; MPhYsH culture-dependent on heterologous sunflower broth 25mL<sup>-1</sup>; MPhYsL, culture-dependent on heterologous sunflower broth 5mL<sup>-1</sup>.
